# Supplementary material for: Manipulation of lignin metabolism by plant densities and its relationship with lodging resistance in wheat
Source: PubMed Central journal article supplement (PMC5288770; doi:10.1038/srep41805), 2017-02-02
Supplement: srep41805-s1.pdf [file srep41805-s1.pdf]

## Supplementary material

### **Manipulation of lignin metabolism by plant densities and its relationship with lodging resistance in wheat**

**Mengjing Zheng<sup>1\*</sup>, Chen Jin<sup>1\*</sup>, Yuhua Shi<sup>2\*</sup>, Yanxia Li<sup>1\*</sup>, Dongqing Yang<sup>1</sup>, Yongli Luo<sup>1</sup>, Dangwei Pang<sup>1</sup>, Xu**

**Xu<sup>1</sup>, Yanping Yin<sup>1</sup>, Wenqian Li<sup>1</sup>, Jun Ni<sup>1</sup>, Yuanyuan Wang<sup>1</sup>, Zhenlin Wang<sup>1\*</sup> & Yong Li<sup>1\*</sup>**

<sup>1</sup>State Key Laboratory of Crop Biology, Ministry of Science and Technology, Shandong Agricultural University,

Tai'an 271018, Shandong, P. R. China.

<sup>2</sup>Agricultural Bureau of Yanzhou District, Jining, Shandong, P. R. China.

\* **Corresponding author.** E-mail addresses: zlwang@sdau.edu.cn; xmliyong@sdau.edu.cn.

## Discussion

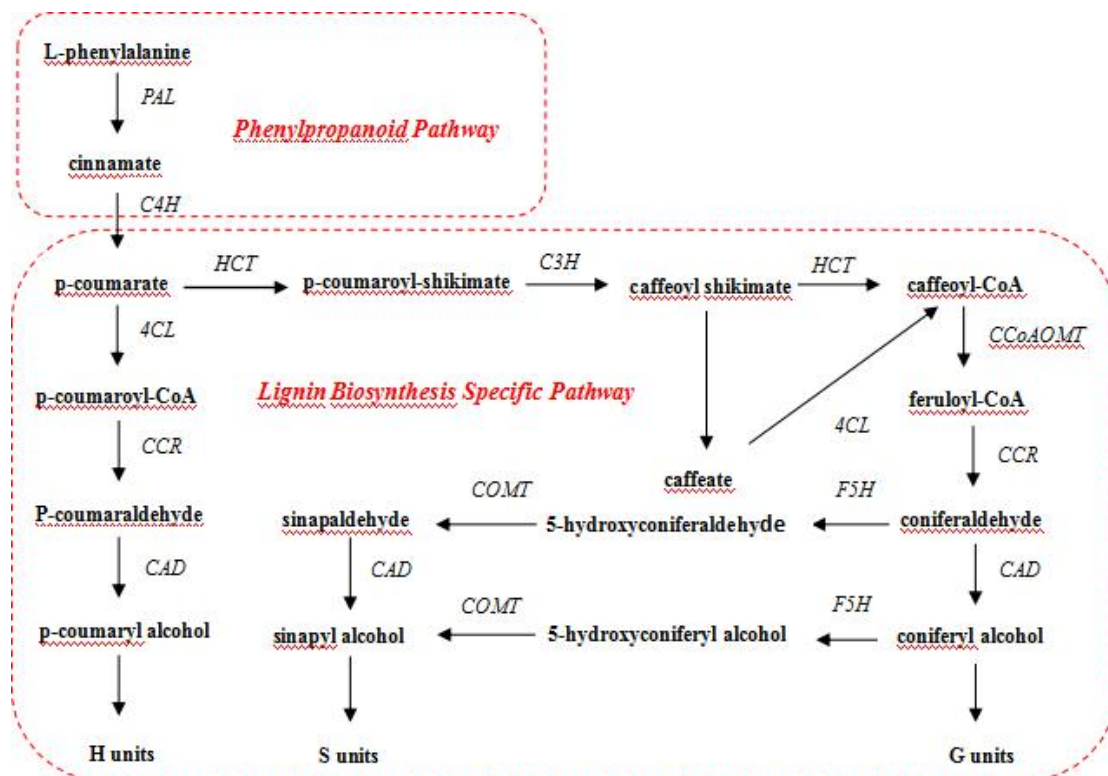

Fig. S1 Pathways for the biosynthesis of lignin monolignols. PAL, phenylalanine ammonia-lyase; C4H, cinnamate 4-hydroxylase; 4CL, 4-coumarate:CoA ligase; HCT, *p*-hydroxycinnamoyl-CoA shikimate/quinic acid hydroxycinnamoyl transferase; CCoAOMT, caffeoyl CoA *o*-methyl transferase; CCR, cinnamoyl CoA reductase; F5H, ferulic acid/coniferaldehyde/coniferyl alcohol 5-hydroxylase; COMT, caffeic acid 3-*o*-methyltransferase; CAD, cinnamyl alcohol dehydrogenase; H, *p*-hydroxyphenyl; G, guaiacyl; S, syringyl.

## Methods

|   | Time (min) | Flow<br>(mL/min) | %A<br>(water) | %B<br>(acetonitrile) | Total runing<br>time (min) |
|---|------------|------------------|---------------|----------------------|----------------------------|
| 1 | Initial    | 0.500            | 95.0          | 5.0                  | Initial                    |
| 2 | 0.50       | 0.500            | 95.0          | 5.0                  | 6                          |
| 3 | 3.00       | 0.500            | 75.0          | 25.0                 | 6                          |
| 4 | 3.50       | 0.500            | 10.0          | 90.0                 | 6                          |
| 5 | 4.00       | 0.500            | 10.0          | 90.0                 | 6                          |
| 6 | 4.10       | 0.500            | 95.0          | 5.0                  | 6                          |
| 7 | 6.00       | 0.500            | 95.0          | 5.0                  | 6                          |

**Table S1 Chromatographic gradient conditions for the analysis of lignin monomers.**

| Compound name       | Parent<br>(m/z) | Daughter<br>(m/z) | Dwell<br>(s) | Cone<br>(V) | Collision<br>(V) |
|---------------------|-----------------|-------------------|--------------|-------------|------------------|
| Hydroxybenzaldehyde | 120.9681        | 92.1073           | 0.050        | 10          | 20               |
| Vanillin            | 150.9681        | 92.0630           | 0.050        | 25          | 22               |
| Vanillin            | 150.9681        | 136.0282          | 0.050        | 25          | 15               |
| Syringaldehyde      | 180.9622        | 151.0684          | 0.050        | 10          | 20               |
| Syringaldehyde      | 180.9622        | 166.0246          | 0.050        | 10          | 12               |

**Table S2 Optimized mass spectra conditions.**

| Gene           | Forward (5'→3')                | Reverse (5'→3')                 | GenBank No. |
|----------------|--------------------------------|---------------------------------|-------------|
| <i>TaPAL</i>   | <i>AGAGCACGGTGAAGAACACGGTA</i> | <i>ACACATACTCCCTGTCCAGAACTC</i> | JQ005112.1  |
| <i>Ta4CL</i>   | <i>GATCGAAGGCTCCGAAATCA</i>    | <i>GACCTTGTGGATCCTCTTGTAG</i>   | KF442977.1  |
| <i>TaCAD</i>   | <i>GCAAGTCCTCCCAAATCCAC</i>    | <i>CCTGTTTTCTGAGGGTGTATCT</i>   | GU563724.1  |
| <i>TaCCR</i>   | <i>CCCAACAAGGTGCTCTGACG</i>    | <i>CCTGTTTTCTGAGGGTGTATCT</i>   | DQ449508.1  |
| <i>TaCOMT</i>  | <i>TAACGAAGGGATGAAGAACC</i>    | <i>GAAGTTGATGCCTTTTATGGT</i>    | EF413031.1  |
| $\beta$ -actin | <i>CCTTCGTTTGGACCTTGCTG</i>    | <i>AGCTGCTCCTAGCCGTTTCC</i>     | AB181991.1  |

**Table S3 Gene names and primer sequences used for Quantitative Real-time PCR.**

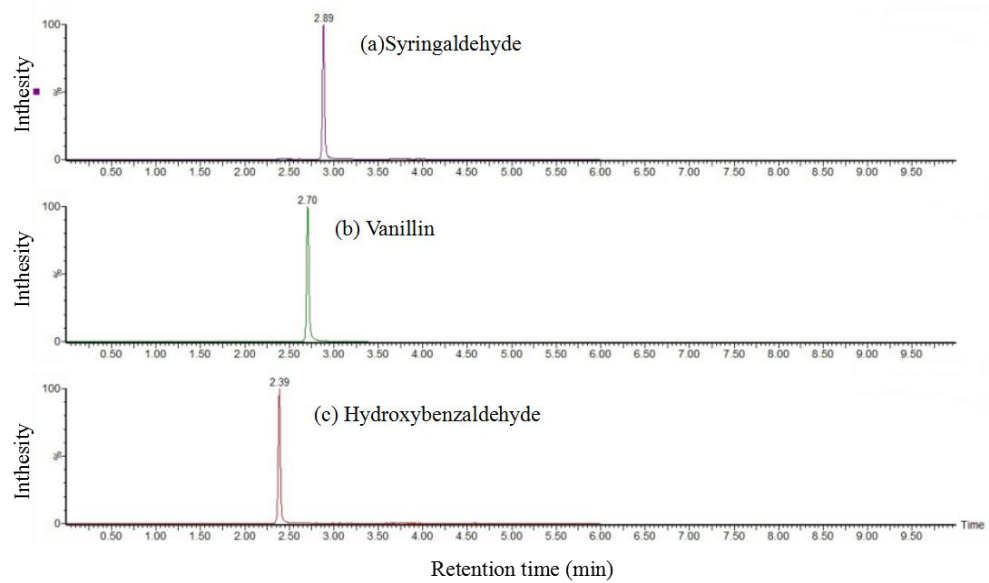

**Fig. S2 UPLC-MS/MS analysis of lignin monomers by nitrobenzene oxidation.** Total ion chromatograms of lignin monomers. (a), syringaldehyde; (b), vanillin; (c), hydroxybenzaldehyde.
